# Supplementary material for: Standardized outcome measures for pregnancy and childbirth, an ICHOM proposal
Source: PubMed Central journal article supplement (PMC6290550; doi:10.1186/s12913-018-3732-3), 2018-12-11

# Additional file 1: Systematic Literature Review

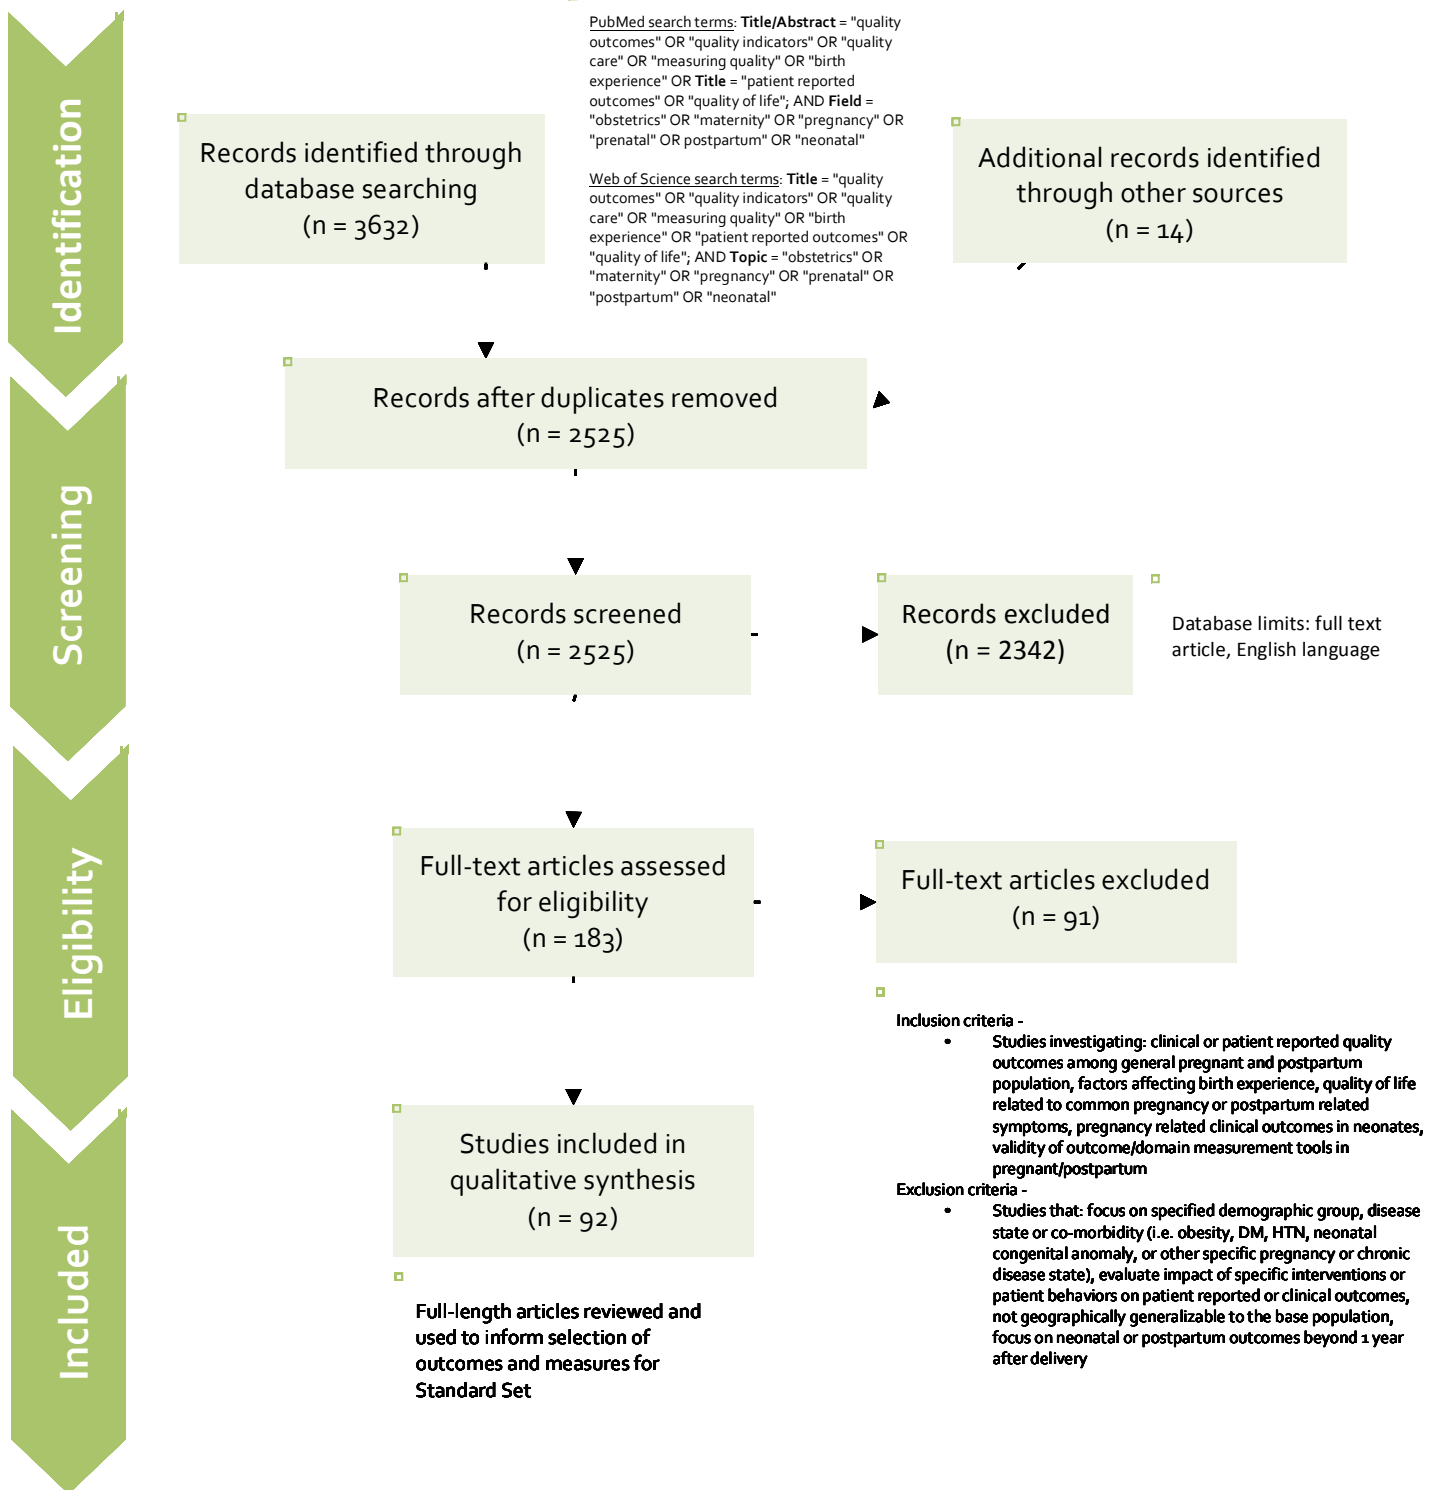

Supplement: 12913_2018_3732_MOESM1_ESM.pdf [file 12913_2018_3732_MOESM1_ESM.pdf]
