# Supplementary material for: Standardized outcome measures for pregnancy and childbirth, an ICHOM proposal
Source: PubMed Central journal article supplement (PMC6290550; doi:10.1186/s12913-018-3732-3), 2018-12-11
Supplement: 12913_2018_3732_MOESM2_ESM.pdf [file 12913_2018_3732_MOESM2_ESM.pdf]

**Additional file 2A. Patient Validation Survey:  
Patient characteristics of survey respondents**

| Baseline characteristics         | Survey respondents<br>N = 105<br>% |
|----------------------------------|------------------------------------|
| Age, years                       |                                    |
| 20-25 years                      | 13%                                |
| 26-30 years                      | 32%                                |
| 31-35 years                      | 38%                                |
| 36-40 years                      | 14%                                |
| >40 years                        | 3%                                 |
| Geography                        |                                    |
| US                               | 43.8%                              |
| Australia                        | 49.5%                              |
| Europe (Germany, France, Norway) | 5.7%                               |
| Stage of care cycle              |                                    |
| Currently preg                   | 25.7%                              |
| Birth in last 6 mo               | 41.9%                              |
| Birth in > 6 mo                  | 42.9%                              |
| 1st pregnancy                    | 25.7%                              |
| Satisfaction with care           |                                    |
| Satisfied                        | 96 (91)                            |
| Unsatisfied                      | 9 (9)                              |
| Experience of care               |                                    |
| Routine                          | 62.9%                              |
| Complicated                      | 37.1%                              |

**Additional file 2B. Patient validation survey: Results on score of importance of outcome domains.**

| Outcomes                                        | % rating "very important" (score 7-9) | Mean score | Does this list capture all important outcome domains? |
|-------------------------------------------------|---------------------------------------|------------|-------------------------------------------------------|
| Maternal death                                  | 83%                                   | 8.2        | Agree 84%                                             |
| Still birth                                     | 84%                                   | 8.3        | Disagree 16%                                          |
| Neonatal death                                  | 85%                                   | 8.4        |                                                       |
| Major maternal complications                    | 86%                                   | 8.1        | <b>List of additional outcome domains:</b>            |
| Major neonatal complications                    | 90%                                   | 8.3        | Satisfaction with level of intervention 6             |
| Pre-term birth                                  | 74%                                   | 7.5        | Informed choice 5                                     |
| Birth injury                                    | 88%                                   | 8.2        | Respect 2                                             |
| Your general quality of life                    | 62%                                   | 6.6        | Emotional trauma/abuse 2                              |
| Confidence with breastfeeding                   | 66%                                   | 6.8        | Continuity of care 2                                  |
| Success with breastfeeding                      | 64%                                   | 6.6        | Emotional support in post-partum period 2             |
| Postpartum depression                           | 68%                                   | 6.8        | Communication 2                                       |
| Confidence in role                              | 61%                                   | 6.5        | Public reporting 1                                    |
| Incontinence                                    | 56%                                   | 6.1        |                                                       |
| Pain with sex                                   | 52%                                   | 6.2        |                                                       |
| Mother-infant attachment                        | 69%                                   | 6.7        |                                                       |
| Satisfaction with care                          | 68%                                   | 6.9        |                                                       |
| Info, shared decisions, confidence in providers | 71%                                   | 7.1        |                                                       |
